# Supplementary material for: Primary and Acquired Resistance to Immune Checkpoint Inhibitors in Metastatic Melanoma
Source: Oxford University Press journal article supplement (doi:10.1158/1078-0432.ccr-17-2267), 2017-11-10
Supplement: 10780432ccr172267-sup-187353_2_supp_4359808_mykhdp.xlsx [file 10780432ccr172267-sup-187353_2_supp_4359808_mykhdp.xlsx]

## Sheet: Sheet1
Supplementary Table S1: Combination therapies in clinical trials involving immune checkpoint inhibitors
Type of Combination	Checkpoint Targets	Treatment	Cancer Type	Study Phase	Clinical Trial
Combined immune checkpoint blockade	anti-LAG3 and anti-PD-1	BMS-986016 and nivolumab	Advanced solid tumors	Phase I/IIa	NCT01968109
		BMS-986016 and nivolumab	Relapsed or refractory B-cell malignancies	Phase I/IIa	NCT02061761
		IMP321 and pembrolizumab	Unresectable or metastatic melanoma	Phase I	NCT02676869
	anti-TIM3 and anti-PD-L1	LY3321367 and LY3300054	Advanced relapsed/refractory solid tumors	Phase I	NCT03099109
	anti-TIM3 and anti-PD-1	TSR022 and a PD-1 inhibitor	Advanced solid tumors	Phase I	NCT02817633
		MBG453 and PDR001	Advanced solid tumors	Phase I-Ib/II	NCT02608268
	anti-PD-1 and anti-PD-L1/anti-IDO	Nivolumab and a PD-L1/IDO peptide vaccine	Metastatic melanoma	Phase I/II	NCT03047928
	anti-IDO and anti-CTLA-4 or anti-PD-1	Indoximod and ipilimumab, pembrolizumab or nivolumab	Metastatic melanoma	Phase I/II	NCT02073123
	anti-IDO and anti-PD-1	Epacadostat and pembrolizumab	Metastatic melanoma, NSCLC, and urothelial cancer	Phase I/II	NCT02178722
Radiotherapy plus immune checkpoint blockade	anti-CTLA-4	SBRT plus ipilimumab	Metastatic melanoma	Phase I	NCT02406183
	anti-PD-L1	SABR and atezolizumab	Metastatic tumors	Phase II	NCT02992912
Epigenetic modulators plus immune checkpoint blockade	anti-PD-1	Azacitidine and entinostat plus nivolumab	NSCLC	Phase II	NCT01928576
		Entinostat and pembrolizumab	NSCLC, melanoma, and colorectal cancer	Phase Ib/II	NCT02437136
		Vorinostat and pembrolizumab	Advanced renal or urothelial cell carcinoma	Phase I/Ib	NCT02619253
	anti-PD-L1	Entinostat and avelumab	Advanced epithelial ovarian cancer	Phase Ib/II	NCT02915523
	anti-PD-1 and anti-CTLA-4	Entinostat and nivolumab with ipilimumab	Advanced solid tumors, HER-2 negative breast cancer	Phase I	NCT02453620
